# Supplementary material for: We Are Happier than We Realize: Underestimation and Conflation in Measuring Happiness
Source: Springer Nature journal article supplement (doi:10.1007/s10902-016-9831-0), 2017-01-21
Supplement: MOESM1 [file 12012876]

| **Online Supporting Materials** | | | | | | | |
| --- | --- | --- | --- | --- | --- | --- | --- |
|  | | | | | | | |
| **Table 5: Description of Survey Methodology** | | | | | | | |
| **Survey** | **Method** | **Sample Size1** | **Target Population** | **AAPOR RR4 Response Rate** | **Weighting Variables** | **Margin of Error3** | **Design Effect** |
| Sept. 5-9, 2014 | Telephone, Live Caller (cell/LL) | 1078 | Adult residents of NC | 11.50% | Race, Age, Gender, Cell/LL Use | 2.98 | 1.25 |
| Sept. 5-9, 2014 | Online Panel (SSI) | 1036 | Registered Voters in NC | 2.52 | Race, Age, Gender | N/A | 1.09 |
| Feb. 24-28, 2013 | Telephone, Live Caller (cell/LL) | 891 | Adult residents of NC | 8.2 | Race, Age, Gender, Cell/LL Use | 3.28 | 1.15 |
| Oct.21-26, 2012 | Telephone, Live Caller (cell/LL) | 1238 | Registered Voters in NC | 11.5 | Race, Age, Gender | 2.79 | 1.06 |
| Aug.25-30, 2012 | Telephone, Live Caller (cell/LL) | 1230 | Registered Voters in NC | 8.4 | Race, Age, Gender | 2.79 | 1.05 |

1 - Experiments randomly assign some respondents to various control and treatment groups. Those subsample sizes are noted in report.

2 - The response rate for the online survey could not be calculated using RR4 formula. Instead, it was calculated using the following formula:

# responses divided by the # of invitations sent out (1036 responses /42,000 invitations).

3 - Margins of error listed are not adjusted. To calculate adjusted margins of errors to take into account design effects simply multiply the margin of error by the design effect listed in the last column.

**AAPOR Code of Professional Ethics & Practices**
**Who sponsored the research study, who conducted it, and who funded it, including, to the extent known, all original funding sources.**

The research conducted for this project was funded entirely by the authors’ university and was conducted entirely by the authors. All of the telephone surveys were conducted by the authors’ university’s survey research center. The online survey was designed and programmed entirely by the authors of this report, however Survey Sampling International provided respondents via their online panel.

**The exact wording and presentation of questions and responses whose results are reported.**

We list here the wording of the questions regarding happiness

*Telephone Survey Questions*

General Social Survey Wording of Happiness Question:

Taken all together, how would you say things are these days--would you say that you are very happy, pretty happy, or not too happy? [Respondents allowed to refuse or say "don't know".

Modified Wording of Happiness Question:

Taken all together, how would you say things are these days in your life--would you say that you are very happy, pretty happy, or not too happy? [Respondents allowed to refuse or say "don't know"].

Wording of Satisfaction with Life Question:

Taken all together, how satisfied are you with your life these days? Would you say that you are very satisfied, pretty satisfied, not too satisfied, not at all satisfied? [Respondents allowed to refuse or say "don't know"].

*Online Survey*

All registered voters in the online survey conducted in September of 2014 received a battery of likely voter questions that ended with this question.

Thinking back to the elections held for Congress in November 2010, did things come up that kept you from voting, or did you happen to vote? Things came up. I didn't vote., I voted., Don't know

Then respondents were randomly assigned to one of following three groups:

*Control Group*: Taken all together, how would you say things are these days? Would you say that you are ..... Very Happy, Pretty Happy, Not too Happy, Not at all Happy, Don't Know

*Treatment Group 1*: Taken all together, how would you say things are these days in your life? Would you say that you are ... Very Happy, Pretty Happy, Not too Happy, Not at all Happy

*Treatment Group 2*: Taken all together, how satisfied are you with your life these days? Would you say that you are ... Very Satisfied, Pretty Satisfied, Not too Satisfied, Not at All Satisfied, Prefer Not to Say

**A definition of the population under study, its geographic location, and a description of the sampling frame used to identify this population. If the sampling frame was provided by a third party, the supplier shall be named. If no frame or list was utilized, this shall be indicated.**

The population under study in this project for two of the surveys was the adult residents (over the age of 18) living in North Carolina (September 2014 & February 2013). In three surveys (August 2012, October 2012 & the online September 2014 survey) the target population were registered voters in North Carolina). The sampling frames for all surveys, including the online survey, were provided by Survey Sampling International.

**A description of the sample design, giving a clear indication of the method by which the respondents were selected (or self-selected) and recruited, along with any quotas or additional sample selection criteria applied within the survey instrument or post-fielding. The description of the sampling frame and sample design should include sufficient detail to determine whether the respondents were selected using probability or non-probability methods.**

*For each telephone surveys:*

Survey Sampling International, LLC, provide samples of telephone numbers. To equalize the probability of telephone selection, sample telephone numbers are systematically stratified according to subpopulation strata (e.g., zip code, county), which yields a sample from telephone exchanges in proportion to each exchange's share of telephone households in the population of interest. Estimates of telephone households in the population of interest are generally obtained from several databases. Samples of household telephone numbers are distributed across all eligible blocks of numbers in proportion to the density of listed households assigned in the population of interest according to a specified subpopulation stratum. Upon determining the preferred sample size, a sampling interval is calculated by summing the number of listed residential numbers in each eligible block and dividing that sum by the number of sampling points assigned to the population. From a random start between zero and the sampling interval, blocks are selected systematically in proportion to the density of listed household "working blocks."

A block (also known as a bank) is a set of contiguous numbers identified by the first two digits of the last four digits of a telephone number. A working block contains three or more working telephone numbers. Exchanges are assigned to a population on the basis of all eligible blocks in proportion to the density of working telephone households. Once each population's proportion of telephone households is determined, then a sampling interval, based on that proportion, is calculated and specific exchanges and numbers are randomly selected.

The wireless component of the study sample starts with determining which area code-exchange combinations in North Carolina are included in the wireless or shared Telcordia types. Similar to the process for selecting household telephone numbers, wireless numbers involve a multi-step process in which blocks of numbers are determined for each area code-exchange combination in the Telcordia types. From a random start within the first sampling interval, a systematic nth selection of each block of numbers is performed and a two-digit random number between 00 and 99 is appended to each selected nth block stem. The intent is to provide a stratification that will yield a sample that is representative both geographically and by large and small carrier. From these, a random sample is generated.

Because exchanges and numbers are randomly selected, unlisted as well as listed numbers are included in the sample. Thus, the sample of numbers generated for the population of interest constitutes a random sample of telephone households and wireless numbers of the population.

*For the Online Survey:*

The respondents for the online survey were obtained from Survey Sampling International (SSI). SSI uses a combination of both proprietary panels and partner affiliates that have been thoroughly vetted by SSI. SSI refers to this combination of panels as the SSI Blend. Online are recruited in a manner of ways and advertising and are incentivized to participate in surveys with points for completing a survey successfully. These points can be used for various gifts, gift cards, and cash. To obtain a balanced sample that matches the U.S. Census data of the North Carolina adult population we used a quota method. However, because respondents are recruited and not randomly selected, this online survey is not a probability sample.

**Sample sizes and a discussion of the precision of the findings, including estimates of sampling error for probability samples and a description of the variables used in any weighting or estimating procedures. The discussion of the precision of the findings should state whether or not the reported margins of sampling error or statistical analyses have been adjusted for the design effect due to clustering and weighting, if any.**

See Table 5 in Online Supporting Materials for details on each survey.
